# Supplementary material for: All-inorganic Mn2+-doped metal halide perovskite crystals for the late-time detection of X-ray afterglow imaging
Source: Royal Society of Chemistry journal article supplement (doi:10.1039/d3nr02208k), 2023-01-01
Supplement: d3nr02208k1.pdf [file d3nr02208k1.pdf]

## Supporting Information

### **All-inorganic Mn<sup>2+</sup>-doped metal halide perovskite crystals toward late-time detection of X-ray afterglow imaging**

Sijian Wu,<sup>a</sup> Lifang Yuan,<sup>b</sup> Geng Chen,<sup>a</sup> Chaoyue Peng<sup>a</sup> and Yahong Jin<sup>\*a</sup>

<sup>a</sup> *School of Physics and Optoelectronic Engineering, Guangdong University of Technology, WaiHuan Xi Road, No. 100, Guangzhou 510006, China.*

<sup>b</sup> *School of Electronics and Communications, Guangdong Mechanical & Electrical Polytechnic, Guangzhou 510515, P.R. China.*

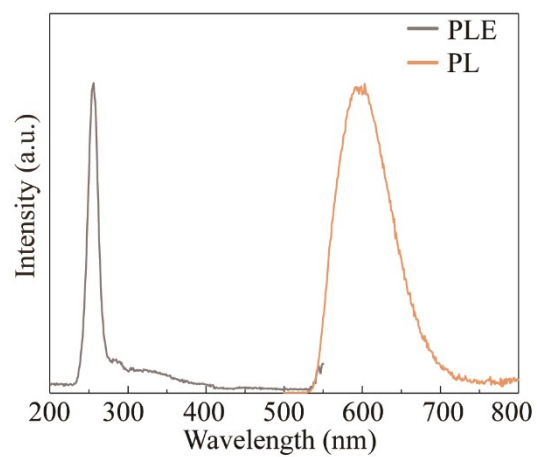

**Figure S1.** PLE/PL spectra of undoped CCCP crystal.

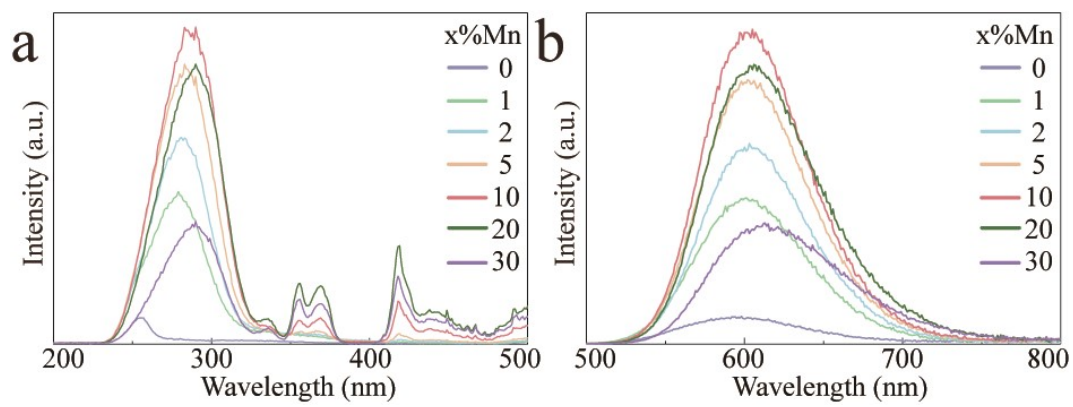

**Figure S2.** a) PLE and b) PL spectra of CCCP:x%Mn (x=0-30) crystals.

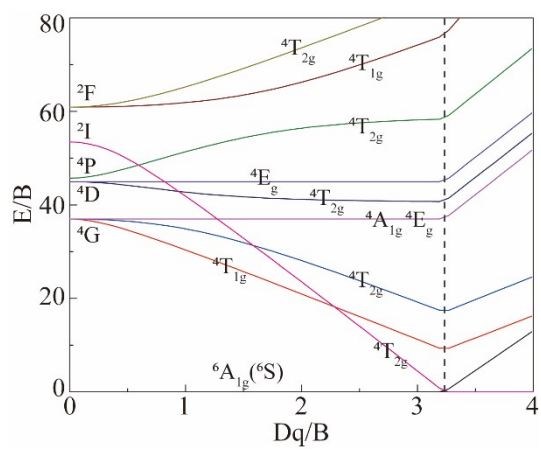

**Figure S3.** Tanabe-Sugano diagram for the illustration of Mn<sup>2+</sup> fluorescence in CCCP crystals.

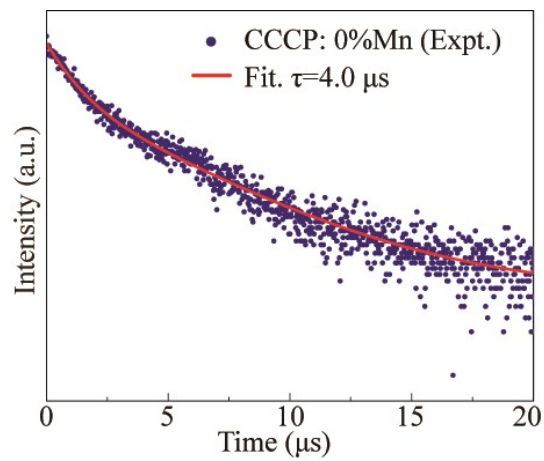

**Figure S4.** Fluorescence decay curves of CCCP:0%Mn ( $\lambda_{\text{ex}}=255 \text{ nm}$ ,  $\lambda_{\text{em}}=596 \text{ nm}$ ).

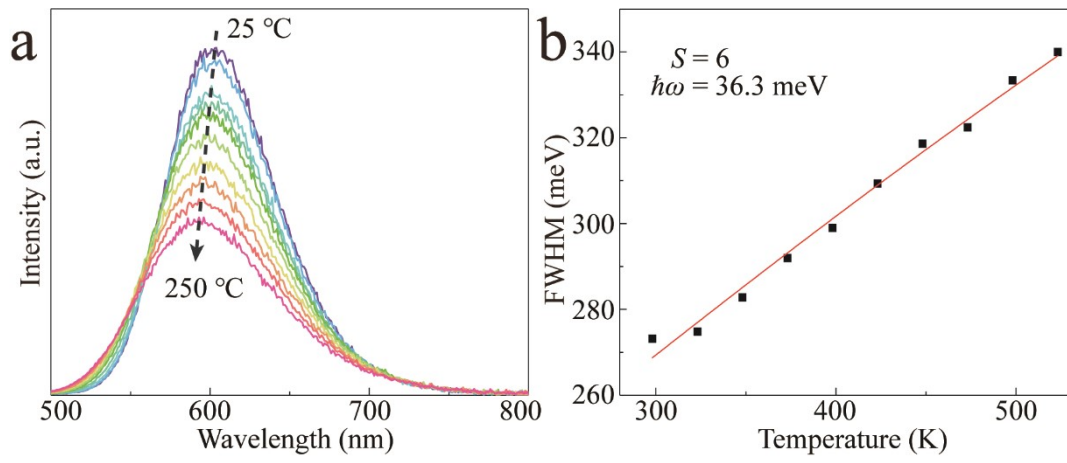

**Figure S5.** a) Temperature-dependent PL spectra of CCCP:10%Mn. b) Fitting diagram of FWHM and temperature.

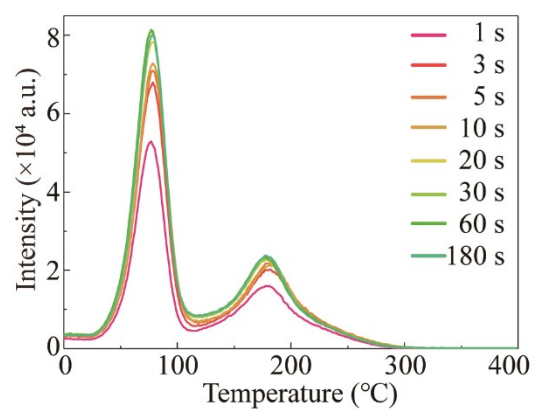

**Figure S6.** TL curves of CCCP:2%Mn crystals collected after 254 nm UV light excitation for different times (1-180 s).

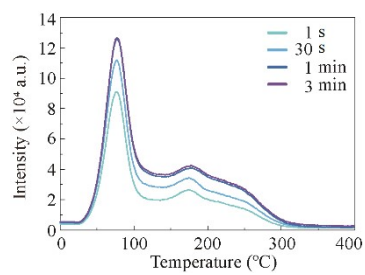

**Figure S7.** TL curves of CCCP:2%Mn crystals collected after X-ray irradiation for different times (1 s-3 min).



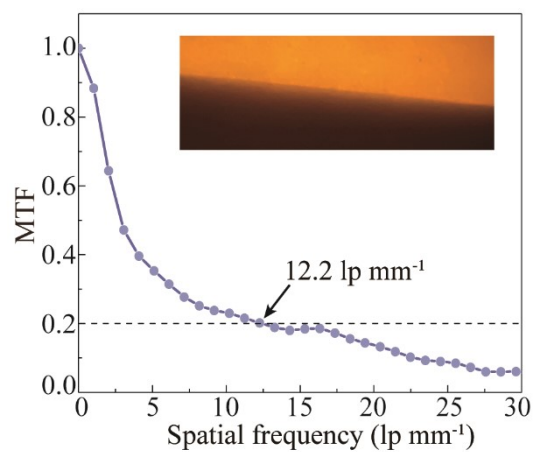

**Figure S8.** MTF curve of the CCCP:2%Mn flexible film, measured by the slanted-edge method (inset).
